# Supplementary material
Source: PubMed Central journal article supplement (PMC212791)
Supplement: nar_31_17_5108__1.pdf [file nar_31_17_5108__1.pdf]

**Supplementary Information**

**3DNA: A Software Package for the Analysis, Rebuilding, and Visualization of Three-dimensional Nucleic Acid Structures**

**Xiang-Jun Lu and Wilma K. Olson\***

Department of Chemistry & Chemical Biology  
Rutgers, the State University of New Jersey  
Wright-Rieman Laboratories  
610 Taylor Road  
Piscataway, NJ 08854-8087, USA

---

\* To whom correspondence should be addressed.  
Tel: 732-445-3993; Fax: 732-445-5958; E-mail: [olson@rutchem.rutgers.edu](mailto:olson@rutchem.rutgers.edu).

**Table S-1.** Base-pair parameters and hydrogen bond characteristics of a representative crystallographic example of each of the classic nucleic acid base pairs with two or more hydrogen bonds between bases.

|                                  | Base-pair Identity <sup>†</sup>               | NDB_ID* | Base IDs <sup>#</sup> | Shear<br>(Å) | Shift<br>(Å) | Stagger<br>(Å) | Buckle<br>(deg) | Prop. Open<br>(deg) | Open<br>(deg) | Hydrogen bonds <sup>§</sup><br>Atom IDs<br>Length (Å) |
|----------------------------------|-----------------------------------------------|---------|-----------------------|--------------|--------------|----------------|-----------------|---------------------|---------------|-------------------------------------------------------|
| <b>Homo purine pairs (7)</b>     |                                               |         |                       |              |              |                |                 |                     |               |                                                       |
| I.                               | A+A N1...HN6H sym.<br>WC/WC <i>trans</i>      | rr0033  | A204·A436             | -1.45        | -1.36        | -0.56          | -4.0            | -16.3               | 175.0         | N6...N1 2.88<br>N1...N6 3.01                          |
| II.                              | A+A N7...HN6H sym.<br>H/H <i>trans</i>        | rr0033  | A161·A174             | 6.05         | -5.01        | -0.05          | 15.5            | 6.4                 | 175.7         | N7...N6 2.76<br>N6...N7 2.99                          |
| III.                             | G+G N1...C=O6 sym.<br>WC/WC <i>trans</i>      | rr0025  | G1383·G1481           | -0.34        | -1.03        | 2.32           | 29.6            | -4.0                | 165.5         | O6...N1 3.37<br>N1...O6 2.89                          |
| IV.                              | G+G N3...HN2H sym.<br>S/S <i>trans</i>        | rr0033  | G32·G456              | 3.06         | 8.04         | -0.98          | -13.6           | 8.7                 | 175.3         | N2...N3 2.94<br>N3...N2 3.10                          |
| V.                               | A-A N1...HN6H, HN6H...N7<br>WC/H <i>trans</i> | rr0033  | A455·A460             | 3.94         | 1.36         | 1.37           | 13.0            | 15.5-108.9          |               | N6...N7 2.90<br>N1...N6 3.01                          |
| VI.                              | G+G N1...O6=C, HN2H...N7<br>WC/H <i>cis</i>   | rr0033  | G56·G84               | 2.16         | 3.07         | 0.34           | -13.1           | -4.0                | -85.3         | N1...O6 2.76<br>N2...N7 2.75                          |
| VII.                             | G-G N1...N7, HN2H...O6=C<br>WC/H <i>trans</i> | rr0033  | G2082·G535            | 5.55         | -0.51        | 0.34           | 5.3             | 20.7-101.1          |               | N1...N7 3.08<br>N2...O6 2.53                          |
| <b>Hetero purine pairs (4)</b>   |                                               |         |                       |              |              |                |                 |                     |               |                                                       |
| VIII.                            | A-G N1...N1, HN6H...O6=C<br>WC/WC <i>cis</i>  | rr0033  | A2596·G2582           | 0.39         | 1.47         | -0.11          | 7.5             | -8.3                | -14.4         | N6...O6 2.95<br>N1...N1 2.83                          |
| IX.                              | A+G N7...N1, HN6H...O6=C<br>H/WC <i>cis</i>   | rr0020  | A665·G724             | 0.56         | -4.95        | 0.49           | -7.5            | -1.9                | 95.7          | N7...N1 3.17<br>N6...O6 2.82                          |
| X.                               | A+G HN6H...N3, N1...HN2H<br>WC/S <i>trans</i> | rr0033  | A629·G2070            | -3.25        | 4.11         | 0.11           | 4.4             | -10.0               | 69.4          | N6...N3 3.14<br>N1...N2 2.94<br>(N6...O2') 2.93       |
| XI.                              | A-G N7...HN2H, HN6H...N3<br>H/S <i>trans</i>  | rr0033  | A215·G225             | -6.82        | -4.21        | -0.42          | 2.8             | 10.9                | -2.2          | N7...N2 2.95<br>N6...N3 3.08<br>(N6...O2') 2.99       |
| <b>Homo pyrimidine pairs (5)</b> |                                               |         |                       |              |              |                |                 |                     |               |                                                       |
| XII.                             | U+U C=O4...N3 sym.<br>WC/WC <i>trans</i>      | rr0033  | U1838·U2621           | -1.62        | 1.43         | -0.23          | 2.9             | 5.2-175.4           |               | N3...O4 2.78<br>O4...N3 2.96                          |
| XIII.                            | U+U C=O2...N3 sym.<br>WC/WC <i>trans</i>      | rr0052  | U956·U960             | -1.95        | -2.78        | -0.19          | -13.1           | -1.3-169.0          |               | O2...N3 2.85<br>N3...O2 3.23<br>(O2...O4) 3.20        |

**Table S-1- continued**

|                                     | Base-pair Identity <sup>†</sup>                | NDB_ID* | Base IDs <sup>#</sup> | Shear<br>(Å) | Shift<br>(Å) | Stagger<br>(Å) | Buckle<br>(deg) | Prop.<br>(deg) | Open<br>(deg) | Hydrogen bonds <sup>§</sup><br>Atom IDs<br>Length (Å) |
|-------------------------------------|------------------------------------------------|---------|-----------------------|--------------|--------------|----------------|-----------------|----------------|---------------|-------------------------------------------------------|
| XIV.                                | C+C N3...HN4H sym.<br>WC/WC <i>trans</i>       | rr0014  | C2105·C2536           | 2.01         | -1.72        | 2.15           | 1.7             | 38.7           | 126.1         | N3...N4 N4...N3<br>3.34 2.09                          |
| XV.                                 | C+C C=O2...HN4H sym.<br>WC/WC <i>trans</i>     | pr0004  | C16·C59               | 1.76         | 1.21         | 0.60           | -3.4            | 16.5           | 176.7         | O2...N4 N4...O2 (N3...N3)<br>3.19 2.84 2.96           |
| XVI.                                | U-U C=O2...N3, ·N3...O4=C<br>WC/WC <i>cis</i>  | rr0033  | U391·U398             | 2.27         | -1.79        | 0.27           | 6.5             | -11.7          | 12.4          | O2...N3 N3...O4<br>2.86 2.87                          |
| <b>Hetero pyrimidine pairs (2)</b>  |                                                |         |                       |              |              |                |                 |                |               |                                                       |
| XVII.                               | C+U N3...N3, HN4H...O2=C<br>WC/WC <i>trans</i> | rr0033  | C1394·U1432           | 1.81         | 1.47         | -0.14          | 19.1            | 6.8            | 178.6         | N3...N3 N4...O2 (O2...O4)<br>3.03 2.91 3.22           |
| XVIII.                              | C-U N3...N3, HN4H...O4=C<br>WC/WC <i>cis</i>   | rr0033  | C1545·U1702           | 0.94         | -1.61        | 0.29           | 5.9             | -35.4          | 8.8           | N3...N3 N4...O4<br>3.17 3.16                          |
| <b>Purine-pyrimidine pairs (10)</b> |                                                |         |                       |              |              |                |                 |                |               |                                                       |
| XIX.                                | G-C Watson-Crick<br>WC/WC <i>cis</i>           | rr0033  | G13·C530              | -0.41        | 0.01         | -0.15          | 0.0             | 2.2            | 1.3           | O6...N4 N1...N3 N2...O2<br>3.11 3.06 2.88             |
| XX.                                 | A-U Watson-Crick<br>WC/WC <i>cis</i>           | rr0033  | A16·U527              | 0.06         | -0.20        | 0.26           | 3.6             | -11.1          | -0.6          | N6...O4 N1...N3<br>2.84 2.76                          |
| XXI.                                | A+U reverse Watson-Crick<br>WC/WC <i>trans</i> | rr0033  | A2301·U2306           | 0.27         | 1.25         | -0.34          | 15.5            | 4.9            | 167.3         | N6...O2 N1...N3<br>2.76 2.72                          |
| XXII.                               | G+C reverse Watson-Crick<br>WC/WC <i>trans</i> | rr0033  | G1683·C1377           | 0.02         | 4.11         | 0.33           | 1.7             | 5.7            | 147.5         | N1...O2 N2...N3<br>2.72 3.10                          |
| XXIII.                              | A+U Hoogsteen<br>H/WC <i>cis</i>               | rr0033  | A2793·U2791           | 0.56         | -3.49        | 0.01           | -7.7            | 0.6            | 71.8          | N7...N3 N6...O4 (O2P...O2)<br>2.94 2.79 3.27          |
| XXIV.                               | A-U reverse Hoogsteen<br>H/WC <i>trans</i>     | rr0033  | A160·U176             | -4.22        | -2.06        | -0.63          | -1.1            | -14.0          | -98.7         | N7...N3 N6...O2<br>2.83 2.95                          |
| XXV.                                | A-C reverse Hoogsteen<br>H/WC <i>trans</i>     | rr0033  | A766·C896             | -3.16        | -0.84        | -0.81          | 10.0            | -13.3          | -90.0         | N7...N4 N6...N3<br>2.91 2.92                          |
| XXVI.                               | A+C reverse wobble<br>WC/WC <i>trans</i>       | rr0033  | A1742·C2037           | 0.04         | -1.54        | -0.03          | 30.2            | -6.5           | 163.0         | N6...N3 N1...N4<br>3.02 2.97                          |
| XXVII.                              | G+U reverse wobble<br>WC/WC <i>trans</i>       | rr0033  | G1970·U1966           | 0.34         | -1.53        | 0.60           | 18.1            | -9.3           | 157.3         | O6...N3 N1...O4<br>2.84 2.95                          |
| XXVIII.                             | G-U wobble<br>WC/WC <i>cis</i>                 | rr0033  | G17·U526              | -2.26        | -0.67        | 0.14           | 4.3             | -14.2          | -1.5          | O6...N3 N1...O2<br>2.71 2.67                          |

### Footnotes to Table S-1

- † Roman numerals refer to the base-pair identification code given by Saenger (1); other base pairs with *cis* and *trans* arrangements of a single bifurcated hydrogen bond (2, 3) and with potential steric conflicts (see the Image Library of Biological Macromolecules, IMB Jena for examples: <http://www.imb-jena.de/ImgLibDoc/bp/gc.html>) are omitted. The + and – symbols designate parallel and antiparallel orientations of the interacting bases; the base-pair names are adapted from the Tinoco compilation (4), where sym. is an abbreviation for symmetric, HNH denotes amino, and C=O or O=C stands for carbonyl, and from the proposed classification scheme of Leontis and Westhof (3), where WC, H, and S refer respectively to hydrogen-bonded atoms on the Watson-Crick, Hoogsteen, and sugar edges of a base.
- \* Of the 28 possible base-pair types, examples of 23 are found in the high resolution (2.4 Å) crystal structure of the large ribosomal subunit, NDB\_ID: rr0033 (5). The remaining five examples come from other, less well-resolved ribosomal structures—rr0014 (6), rr0020 (7), rr0025 (8), rr0052 (9)—and from the 2.6 Å resolution structure of the ternary complex of Cys-tRNA<sup>Cys</sup> with the translation elongation factor EF-Tu and GTP, pr0004 (10),
- # Base-pairs are identified using the `find_pair` utility program in 3DNA with the `-p` option. The numerical values refer to the position of a given base in the nucleotide sequence.
- § The atoms comprising the hydrogen bonds associated with a given base-pair type are listed such that the atoms from the base preceding the + or – sign in column 2 appear first in each paired entry. Interactions within parentheses are not included in conventional descriptors of the given base-pair type but are identified by the program. Note the occurrence of potentially repulsive interactions between hydrogen-bond acceptors (O2···O4 and N3···N3) in some examples.

### References to Table S-1

1. Saenger, W. (1984) *Principles of Nucleic Acid Structure*. Springer-Verlag, New York, Chpt. 6.
2. Auffinger, P. and Westhof, E. (1999) Singly and bifurcated hydrogen-bonded base-pairs in tRNA anticodon hairpins and ribozymes. *J. Mol. Biol.* **292**, 467-483.
3. Leontis, N.B. and Westhof, E. (2001) Geometric nomenclature and classification of RNA base pairs. *RNA* **7**, 499-512.
4. Tinoco, J., I. (1993) Appendix 1: structures of base pairs involving at least two hydrogen bonds. In Gesteland, R.F. and Atkins, J.F. (ed.), *The RNA World* Cold Spring Harbor Laboratory Press, Cold Spring Harbor, NY, pp. 603-607.
5. Klein, D.J., Schmeing, T.M., Moore, P.B. and Steitz, T.A. (2001) The kink-turn: a new RNA secondary structure motif. *EMBO J.* **20**, 4214-4221.
6. Nissen, P., Hansen, J., Ban, N., Moore, P.B. and Steitz, T.A. (2000) The structural basis of ribosome activity in peptide bond synthesis. *Science* **289**, 920-930.
7. Brodersen, D.E., Clemons Jr., W.M., Carter, A.P., Morgan-Warren, R.J., Wimberly, B.T. and Ramakrishnan, V. (2000) The structural basis for the action of the antibiotics tetracycline, pactamycin, and hygromycin B on the 30S ribosomal subunit. *Cell* **103**, 1143-1154.
8. Pioletti, M., Schluenzen, F., Harms, J., Zarivach, R., Gluehmann, M., Avila, H., Bashan, A., Bartels, H., Auerbach, T., Jacobi, C., et al. (2001) Crystal structures of complexes of the small ribosomal subunit with tetracycline, edeine and IF3. *EMBO J.* **20**, 1829-1839.
9. Wimberly, B.T., Brodersen, D.E., Clemons Jr., W.M., Morgan-Warren, R.J., Carter, A.P., Vornrhein, C., Hartsch, T. and Ramakrishnan, V. (2000) Structure of the 30S ribosomal subunit. *Nature* **407**, 327-339.
10. Nissen, P., Thirup, S., Kjeldgaard, M. and Nyborg, J. (1999) The crystal structure of Cys-tRNA<sup>Cys</sup>-EF-Tu-GDPNP reveals general and specific features in the ternary complex and in tRNA. *Structure Fold. Des.* **7**, 143-156.
